# Supplementary material
Source: publisher figshare collection journal article supplement (https://gsapubs.figshare.com/ndownloader/files/22759565)
Supplement: Supplementary file 1 [file 22759565]

**METHODS**

Our image base was created from orthorectified Landsat ETM+ images, sharpened to 15 m/pixel resolution. We selected images taken in April or May where possible, because vegetation cover differences are most marked at the end of the rainy season in Madagascar, providing maximum colour contrast between active gullies and non-lavaka'd terrain. We used 7-4-2 band composites, imported into ENVI for image processing. The band composites were first linearly enhanced, and then run through Gram-Spectral sharpening using the panchromatic band 8 (to which a median pass filter had first been applied). The sharpened images were projected in ArcMap 9.2, and further enhanced: first by applying a second pan-sharpening (simple mean) using the panchromatic band 8 image, and finally by increasing image brightness by 8-12% and increasing contrast by 45-55% (both adjustments via the “properties” function of the projected image layer).

We counted 60,946 lavakas on the Landsat images by systematic east-west lawnmowing on 33-km<sup>2</sup> panels (5 km x 6.5 km) at a scale of 1:25,000. Exposed laterite or saprolite—indicating active erosion—showed as dramatic pink in the enhanced images. Only active lavakas (those clearly showing exposed earth in their interiors) were included in our counts. Lavakas were distinguished from other gully or ravine types by their characteristic tadpole or inverted-teardrop shapes; and from non-gullied areas of bare ground by the combination of shape and shadowing indicating steep amphitheatre walls. We were able to ground truth our methodology for a variety of terrain types using

the very high-resolution imagery available for some areas of Madagascar in Google Earth.

We estimate—by comparing our data with  $\approx 2$  m/pixel imagery available for limited areas of Madagascar in Google Earth—that our database is complete for the largest 50% of lavakas, and close to complete for the largest two-thirds. The median lavaka size is  $\approx 1800 \text{ m}^2$  (based on field measurements of 433 lavakas: Wells et al., 1991; Wells, unpublished data; and Cox and Rakotondrazafy, unpublished data), which corresponds to 8 pixels. Lavakas  $< 900 \text{ m}^2$  (4 pixels), representing about a third of lavakas (based on field measurements of 433 lavakas: Wells et al., 1991, and unpublished data), are underrepresented in our database because of resolution issues. Thus, we have a robust dataset for the largest two-thirds of lavakas.

We define the lavaka-prone area as the area within which all counted lavakas are contained (Fig DR 2). It represents that portion of Madagascar having the combination of climate, topography, and bedrock/weathering mantle geology required to support lavaka formation. The lavaka-prone area is  $\approx 225000 \text{ km}^2$ , or  $\approx 40\%$  of the total area of Madagascar. The main lavaka-prone area corresponds to the central highlands; and there is a small secondary lavaka-prone area (the Bekodoka dome: Figs. DR2, DR3) representing a hilly Precambrian basement outlier to the west. A polygon outlining the lavaka-prone area was used for subsequent operations on the raster datasets.

The seismic data were collected and processed by the Institut et Observatoire de Géophysique d'Antananarivo (Bertil and Regnault, 1998; Ramanantsoa, 2000), and imported into ArcMap as X-Y co-ordinates. We plotted two different sets: 2174 events with magnitude 3.0-5.6, recorded 1979-1994 (Bertil and Regnault, 1998); and 1268



events with magnitude 0.5-5.4, recorded in 1996 (Institut et Observatoire de Géophysique d'Antananarivo, 2008). All hypocentres are within the crust, and most are in the depth range 15-30 km (Rambolomanana et al., 1997; Bertil and Regnault, 1998). The location error on each event ranges from 2-15 km (Bertil and Regnault, 1998), but both the sample size (aggregate  $N = 3442$ ) and the spatial scale of the earthquake clustering (Fig. 3) are large enough that this does not affect interpretation of the regional seismicity (e.g. Rambolomanana et al., 1997). The distribution densities of the two datasets are identical within error, and the aggregate  $N$  of 3442 provides a robust sample population from which to compute regional variations in overall seismicity. Of the 3442 events, 2738 occur within the lavaka-prone area; this subset is used to compute the relationship between lavaka and seismic density within the lavaka-prone area (Table DR1, Fig. 4). Magnitude and hypocentre depth are independent of location, and neither shows any correlation with lavaka distribution; so for this analysis we consider only the bulk distribution of seismicity.

The spatial distributions of lavakas and seismic events were analysed using the Spatial Analyst kernel density function within ArcMap (Figs. DR2, DR3), and the Getis-Ord  $G_i^*$  statistic (Ord and Getis, 1995; Getis and Ord, 1996). Getis-Ord analysis addresses spatial relationships among data, and tests for the existence and significance of data clusters or “hot spots” (Getis and Ord, 1996). Implementation of the Getis-Ord statistic requires weighted data, so we first converted the mapped lavaka and seismic event locations to local densities (using the kernel density function). The density raster data were converted to point data, with each point on the map representing the local feature density. These weighted point data were then input to the Getis-Ord analysis.

The Getis-Ord  $G_i^*$  statistic is a Z score, representing the difference between the local sample and the weighted global mean of the data, divided by the weighted local standard deviation. Thus,  $G_i^*$  is positive when a cluster has values higher than the mean, and negative when the values are lower. Although it is based on properties of the normal distribution, the test does not require that the underlying data are normally distributed: as long as the sample size is sufficiently large, the results of the statistical test are asymptotically normal (Lin, 2004). The critical value for 95% confidence that clustering exists is  $G_i^* > +1.96$ . The clustering of lavakas (Fig. 2) and of seismic events (Fig. 3) is clearly demonstrated by the magnitude of the  $G_i^*$  values: areas shown in red have  $G_i^* > 10$ , i.e. more than 10 standard deviations from the mean, representing exceptionally dense clustering.

To quantify the distribution of lavakas as a function of seismic activity, we reclassified the seismic kernel density raster data and converted them to polygons, each representing an area characterised by a specific seismic density range. We cropped those portions of the seismic density polygons that fell outside the lavaka-prone area, and also excluded the area occupied by Lac Alaotra, thereby constraining the seismicity-lavaka analysis to those areas where bedrock geology, topography, and climate combine to make lavaka activity possible\*.

We measured the polygon sizes to get the total area represented by each seismic density bracket. As the brackets were derived from a probability density function superimposed on the data (thus nominal rather than actual representations of the true

---

\* We note that the same lavaka vs. seismic density patterns result whether or not the analysis is restricted to the lavaka-prone area: because all lavakas and most seismicity are restricted to the central spine of Madagascar, a straight nationwide correlation produces the same logarithmic trend. But the analysis is tighter and more representative of the underlying connections when restricted to the central uplands.

seismic densities), we went back and counted the absolute number of seismic events captured in each bracket. Thence we calculated the actual seismic densities for those areas. Finally, we counted the number of lavakas occurring in each polygon, from which we calculated the lavaka density for each seismic density bracket (Table DR 1).

## REFERENCES

- Bertil, D., and Regnault, J.M., 1998, Seismotectonics of Madagascar: Tectonophysics, v. 294, p. 57-74.
- Getis, A., and Ord, J.K., 1996, Local spatial statistics: an overview, *in* Longley, P., and Batty, M., eds., Spatial Analysis: Modeling in a GIS Environment: Cambridge, Geoinformation International, p. 261-277.
- Institut et Observatoire de Géophysique d'Antananarivo, 2008, Liste des seismes locaux enregistrés par le réseau sismique Malgache en 1996:  
<http://www.refer.mg/edu/minesup/antanana/ioga/sisdata.htm>.
- IOGA, 2008, Liste des seismes locaux enregistrés par le réseau sismique Malgache en 1996: Institut et Observatoire de Géophysique d'Antananarivo:  
<http://www.refer.mg/edu/minesup/antanana/ioga/sisdata.htm>.
- Le Bourdieu, F., Battistini, R., and LeBourdieu, P., 1971, Atlas de Madagascar: Tananarive, Bureau pour le Développement de la Production Agricole, 120 p.
- Lin, G., 2004, Comparing spatial clustering tests based on rare to common spatial events: Computers, Environment, and Urban Systems, v. 28, p. 691-699.  
doi:10.1016/j.compenvurbsys.2003.07.002.

- Ord, J.K., and Getis, A., 1995, Local spatial autocorrelation statistics: Distributional issues and an application: *Geographical Analysis*, v. 27, p. 286-306.
- Ramanantsoa, A.H., 2000, Seismic observation in Madagascar: *Bulletin of the International Institute of Seismology and Earthquake Engineering*, v. 34, p. 59-69.
- Rambolomanana, G., Suhadolc, P., and Panza, G.F., 1997, Simultaneous inversion of hypocentral parameters and structure velocity of the central region of Madagascar as a premise for the mitigation of seismic hazard in Antananarivo: *Pure and Applied Geophysics*, v. 149, p. 707-730.
- Wells, N.A., 2003, Some hypotheses on the Mesozoic and Cenozoic paleoenvironmental history of Madagascar, *in* Goodman, S.M., and Benstead, J.P., eds., *The Natural History of Madagascar*: Chicago, University of Chicago Press, p. 16-34.
- Wells, N.A., Andriamihaja, B., and Rakotovololona, H.F.S., 1991, Patterns of development of lavaka, Madagascar's unusual gullies: *Earth Surface Processes and Landforms*, v. 16, p. 189-206.

## SUPPLEMENTAL MATERIAL FIGURE CAPTIONS

Fig. DR1: Examples of areas with similar convex-hill topography but differing local lavaka densities. Image A is centred at approximately 18.53°S 47.78°E, and B is centred at approximately 17.36°S, 47.86°E. (locations are shown on Fig. 2). The two areas have the same climate: both have >1500 mm of rainfall per year, mean cold-month low temperatures of 10-15°C, and 3-4 dry months per year (Le Bourdieu et al., 1971; Wells, 2003). Valley bottoms in image B are broad and flat, reflecting high local sedimentation rates due to lavaka activity. These images serve also as an illustration of the lack of connection between human activity and lavaka formation. Image A, with no lavakas, has substantial human habitation and land use, a greater density of roads and tracks, a wide range of field types on the hills, and extensive evidence for unvegetated bare earth (pale pink patches and mottling on the hillslopes). Image B, in contrast, has very little habitation and agriculture (there are a few fields in some of the valleys, and a couple of huts in white circular areas on ridge crests), few tracks, and few areas of bare or disturbed ground; yet lavakas are abundant. Image A is 50 km northeast of Antananrivo, slightly east of the lavaka hotspot region (Fig. 2). Image B, however, about 40 km east of Andriamena, is within one of the largest hotspot areas (Fig. 2), spatially associated with the Lac Alaotra seismic hotspot region (Fig. 3), which has the greatest earthquake densities in Madagascar. Image A, with no active lavakas, has in fact been extensively lavaka'd in the past: many ancient lavakas can be distinguished by their rounded amphitheatrical headwalls and

narrow outlets (one example is labelled “AL”). Image B has very few of these features. Images © 2008 Europa Technologies, Digital Globe, and Google Earth; reproduced by fair-use permission ([www.google.com/permissions/geoguidelines.html](http://www.google.com/permissions/geoguidelines.html)).

Fig. DR2: Density distribution for lavakas in Madagascar. We mapped Madagascar's large lavakas from Landsat images at 15 m/pixel resolution, generating a database of 60,946 individual lavaka locations from which we computed the density distribution (see Supporting Online Material: Methods). Because of image resolution, only the largest  $\approx 2/3$  of lavakas are represented by the numerical densities; but the relative densities and distribution patterns are representative of the general lavaka population. The lavaka-prone area is defined as the area inside the envelopes that enclose all the datapoints, and represents  $\approx 40\%$  of the total area of Madagascar. Spatial statistical analysis of the data is shown in main manuscript Fig. 2.

Fig. DR3: Density distribution for 3442 seismic events (magnitudes 0.5-5.6), recorded between 1979-1994 (Bertil and Regnault, 1998; Ramanantsoa, 2000), and in 1996 (IOGA, 2008). The densities are nominal, not absolute, because they represent the period of record only; but the dataset is sufficiently large to represent a robust proxy for long-term seismic activity (Bertil and Regnault, 1998). Of the 3442 events, 2738 (80%) occur within the lavaka-prone area (outline shown). Spatial statistical analysis of the data is shown in main manuscript Fig. 3.



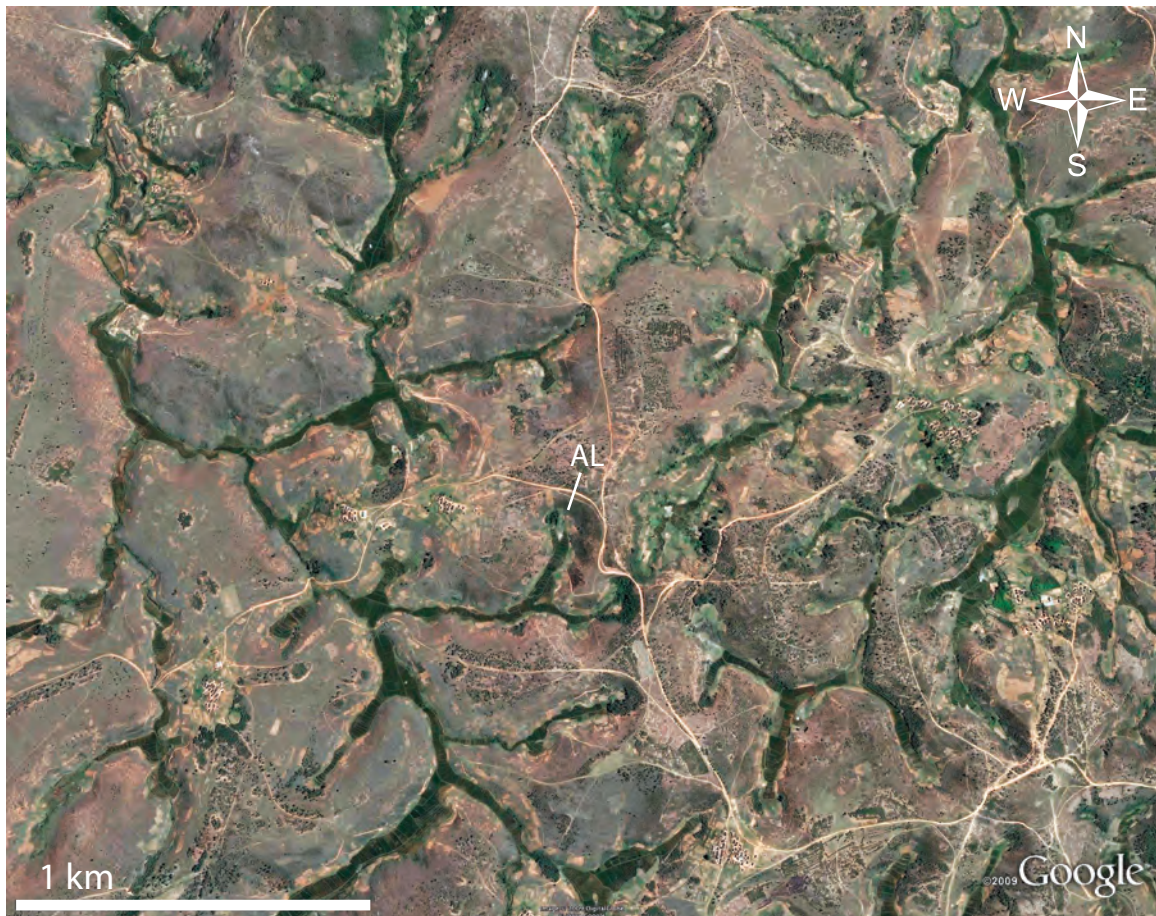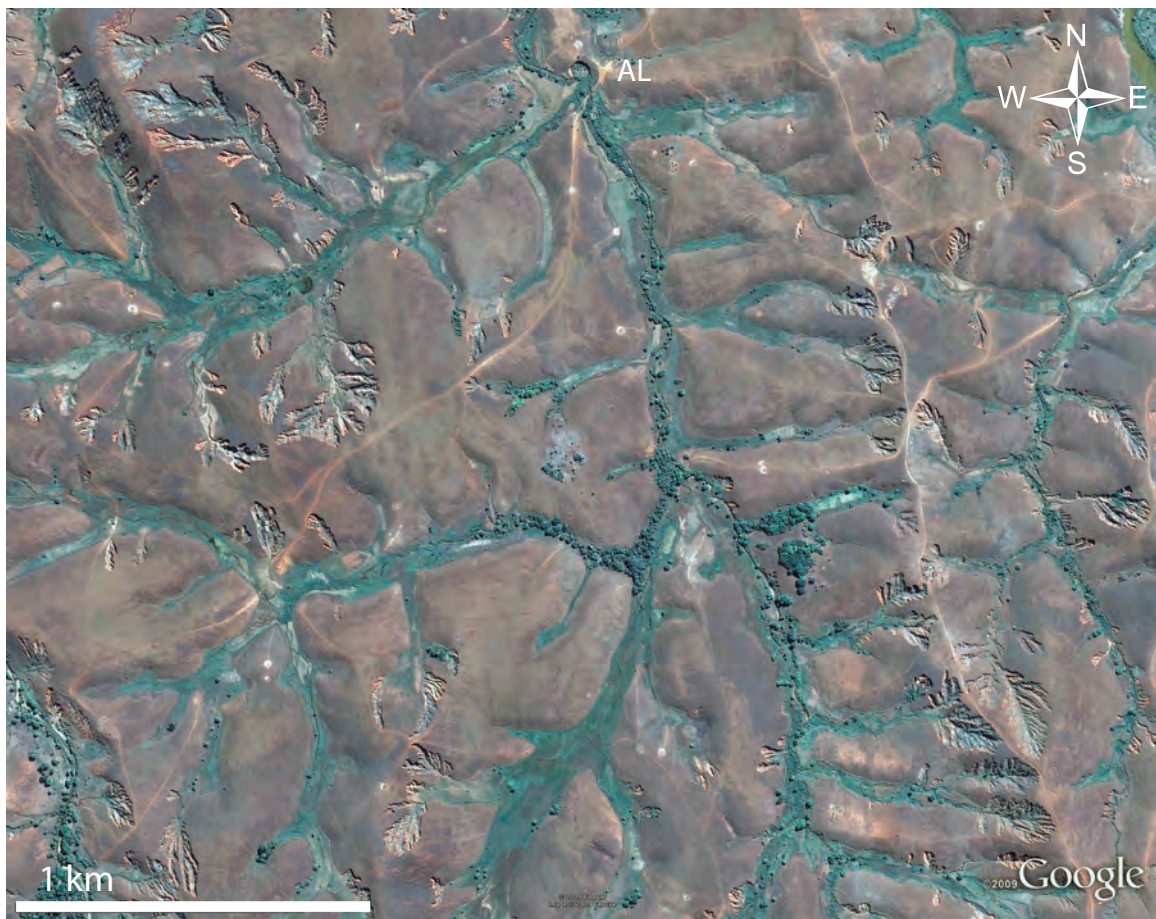

Cox et al. Fig. DR 2

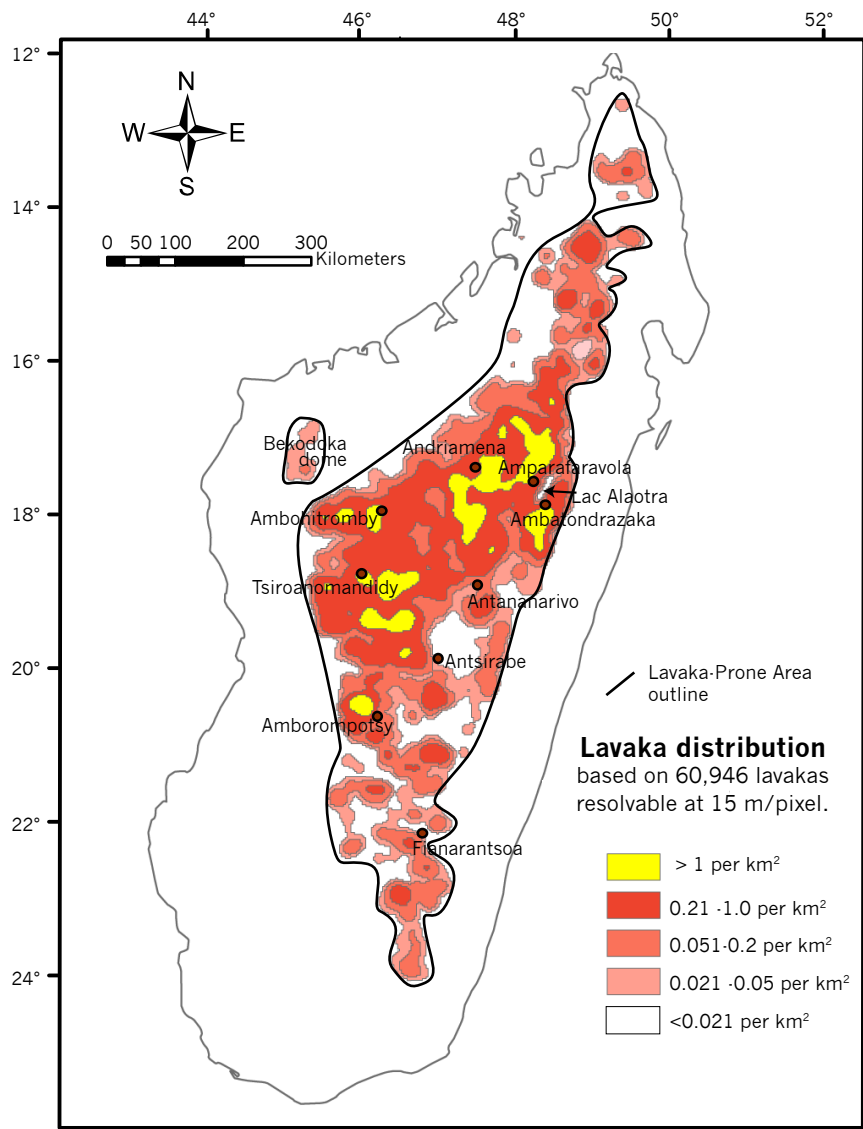



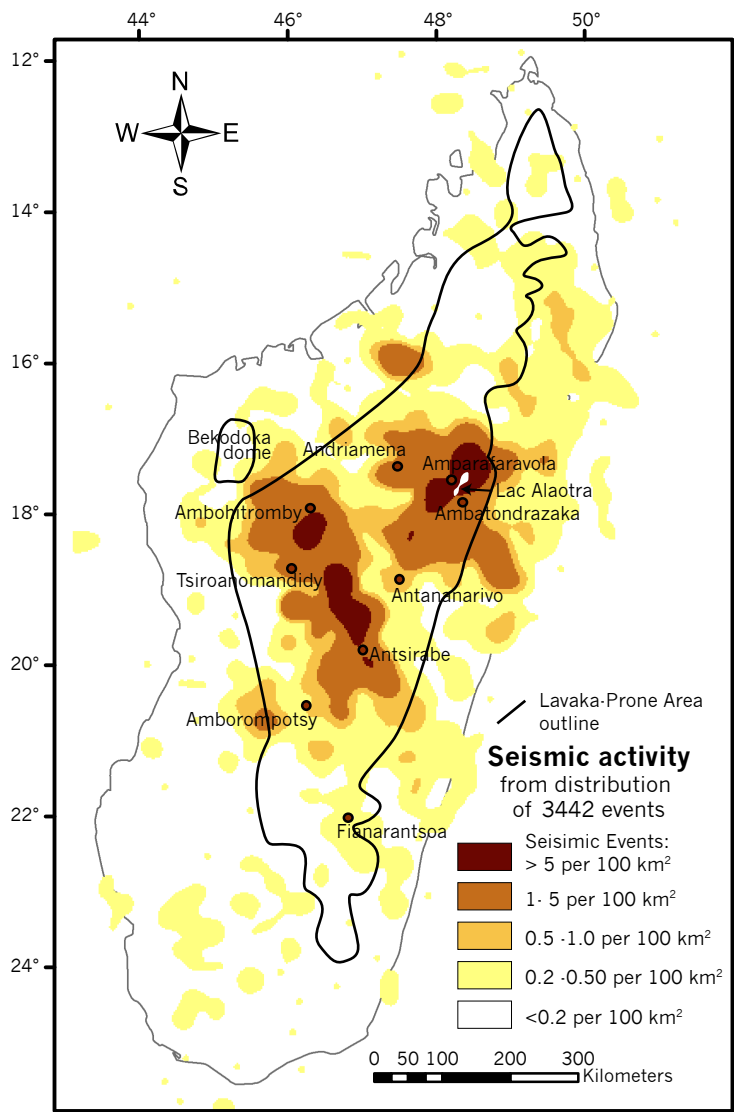

Table DR 1. Densities of seismic events and lavakas within the lavaka-prone area (LPA). The total number of lavakas is 60,946, and the total number of seismic events within the LPA is 2738. Densities are nominal: they represent lavakas resolvable at 15 m/pixel, and seismic events from two discrete collection intervals. Data were analysed using ArcMap. See Methods section for more information.

| <sup>†</sup> Seismic density bracket | *Area (km <sup>2</sup> ) | Number of seismic events | <sup>§</sup> Seismic events per 100km <sup>2</sup> | Number of lavakas | Lavakas/km <sup>2</sup> |
|--------------------------------------|--------------------------|--------------------------|----------------------------------------------------|-------------------|-------------------------|
| 1                                    | 60,797                   | 0                        | 0                                                  | 5242              | 0.09                    |
| 2                                    | 27,472                   | 33                       | 0.1                                                | 2505              | 0.09                    |
| 3                                    | 19,220                   | 33                       | 0.2                                                | 3525              | 0.18                    |
| 4                                    | 11,472                   | 58                       | 0.4                                                | 2562              | 0.22                    |
| 5                                    | 14,821                   | 42                       | 0.4                                                | 2726              | 0.18                    |
| 6                                    | 4,952                    | 54                       | 0.6                                                | 1649              | 0.33                    |
| 7                                    | 3,852                    | 46                       | 0.6                                                | 1349              | 0.35                    |
| 8                                    | 8,637                    | 44                       | 0.6                                                | 2201              | 0.25                    |
| 9                                    | 7,270                    | 28                       | 0.6                                                | 2073              | 0.29                    |
| 10                                   | 5,849                    | 23                       | 0.8                                                | 1850              | 0.32                    |
| 11                                   | 25,351                   | 320                      | 1.3                                                | 11734             | 0.46                    |
| 12                                   | 13,573                   | 314                      | 2.3                                                | 10018             | 0.74                    |
| 13                                   | 8,248                    | 280                      | 3.4                                                | 5506              | 0.67                    |
| 14                                   | 4,814                    | 227                      | 4.7                                                | 2574              | 0.53                    |
| 15                                   | 2,433                    | 148                      | 6.1                                                | 1345              | 0.55                    |
| 16                                   | 1,825                    | 147                      | 8.1                                                | 1008              | 0.55                    |
| 17                                   | 983                      | 149                      | 8.7                                                | 511               | 0.52                    |
| 18                                   | 490                      | 86                       | 9.6                                                | 244               | 0.50                    |
| 19                                   | 1,493                    | 47                       | 10                                                 | 1114              | 0.75                    |
| 20                                   | 1,186                    | 508                      | 43                                                 | 1199              | 1.01                    |
| 21                                   | 5                        | 151                      | 3020                                               | 11                | 2.20                    |

<sup>†</sup>Equal-interval brackets from kernel density function in ArcMap

\*LPA only. Total LPA  $\approx$  225,000 km<sup>2</sup>, i.e.  $\approx$ 40% of the area of Madagascar.

<sup>§</sup> Absolute number of seismic events occurring in each density bracket, divided by area
